# Supplementary material for: Measurement report: Atmospheric new particle formation in a coastal agricultural site explained with binPMF analysis of nitrate CI-APi-TOF spectra
Source: Copernicus journal article supplement (doi:10.5194/acp-22-8097-2022), 2022-06-22
Supplement: Supplementary file 1 [file acp-22-8097-2022-supplement.pdf]

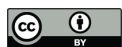

*Supplement of*

**Measurement report: Atmospheric new particle formation in a coastal agricultural site explained with binPMF analysis of nitrate CI-API-TOF spectra**

**Miska Olin et al.**

*Correspondence to:* Miska Olin (miska.olin@tuni.fi)

The copyright of individual parts of the supplement might differ from the article licence.

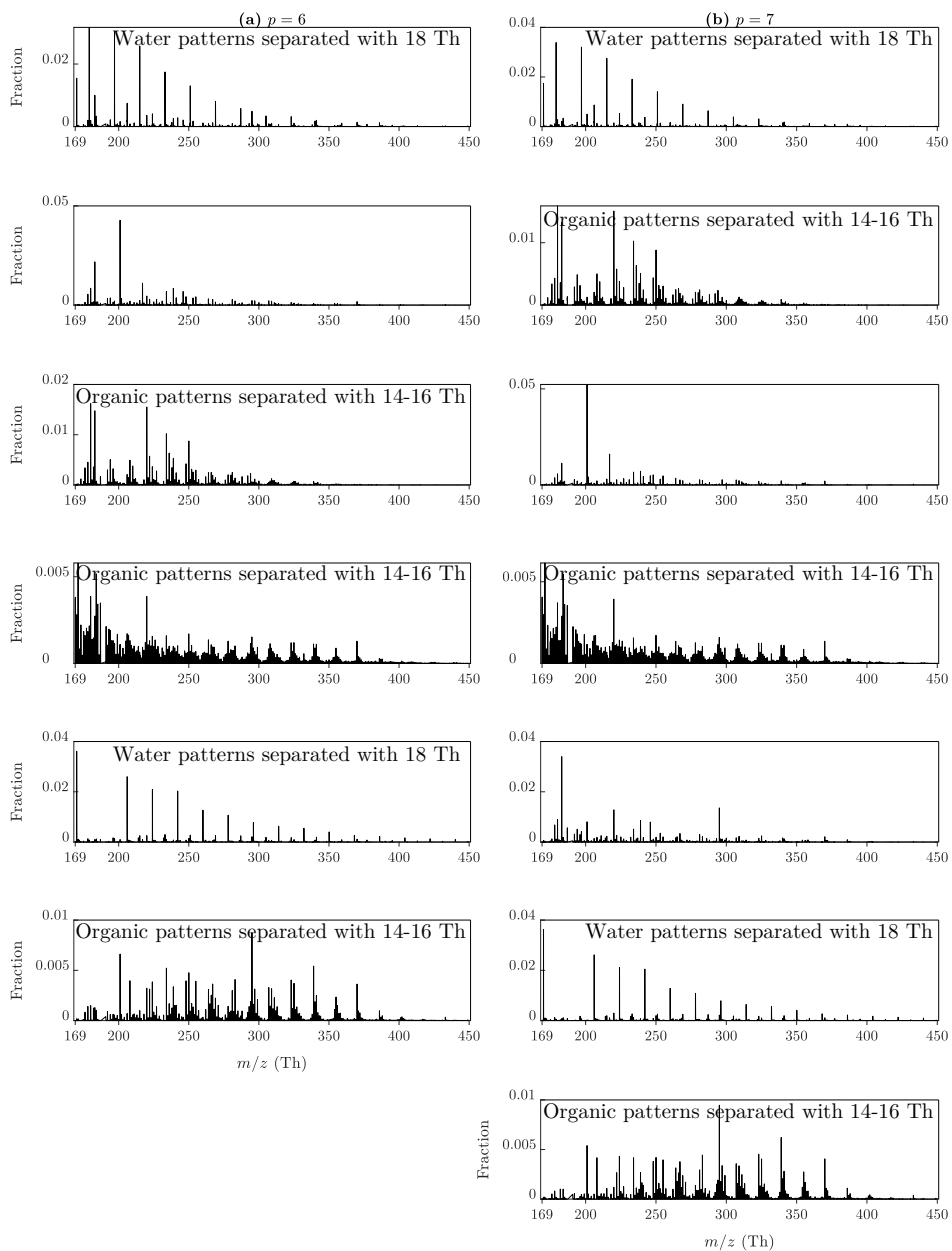

**Figure S1.** Normalized spectra of all binPMF factors if (a)  $p = 6$  or (b)  $p = 7$  were used. Both of these factor sets have three factor profiles having organic patterns, whereas  $p = 8$  results in four factor profiles having organic patterns and is further analyzed in this study.

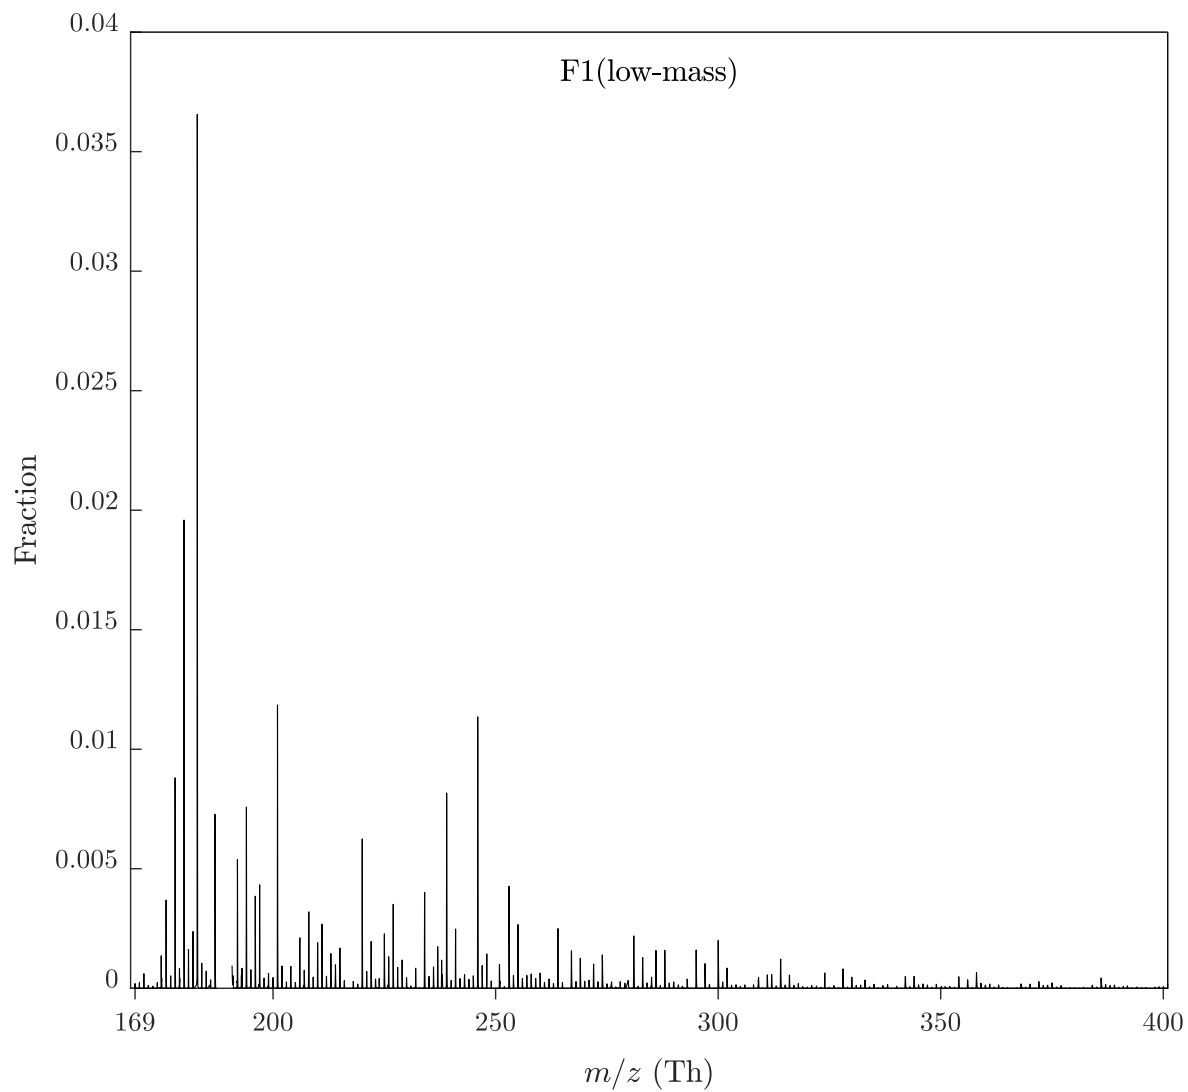

**Figure S2.** Normalized spectrum of the binPMF factor F1(low-mass) up to 400 Th.

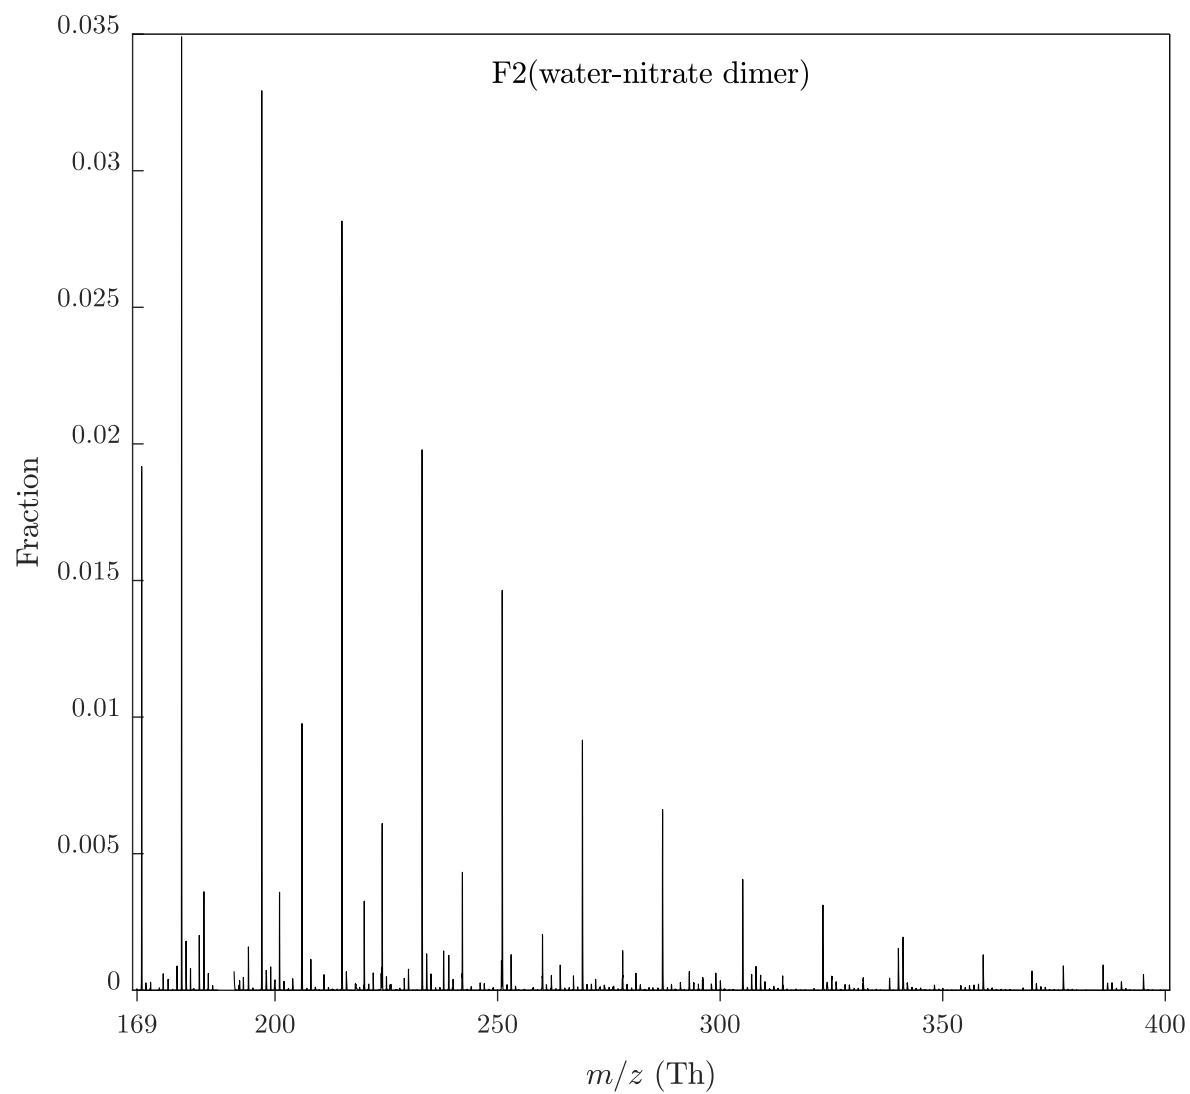

**Figure S3.** Normalized spectrum of the binPMF factor F2(water–nitrate dimer) up to 400 Th.

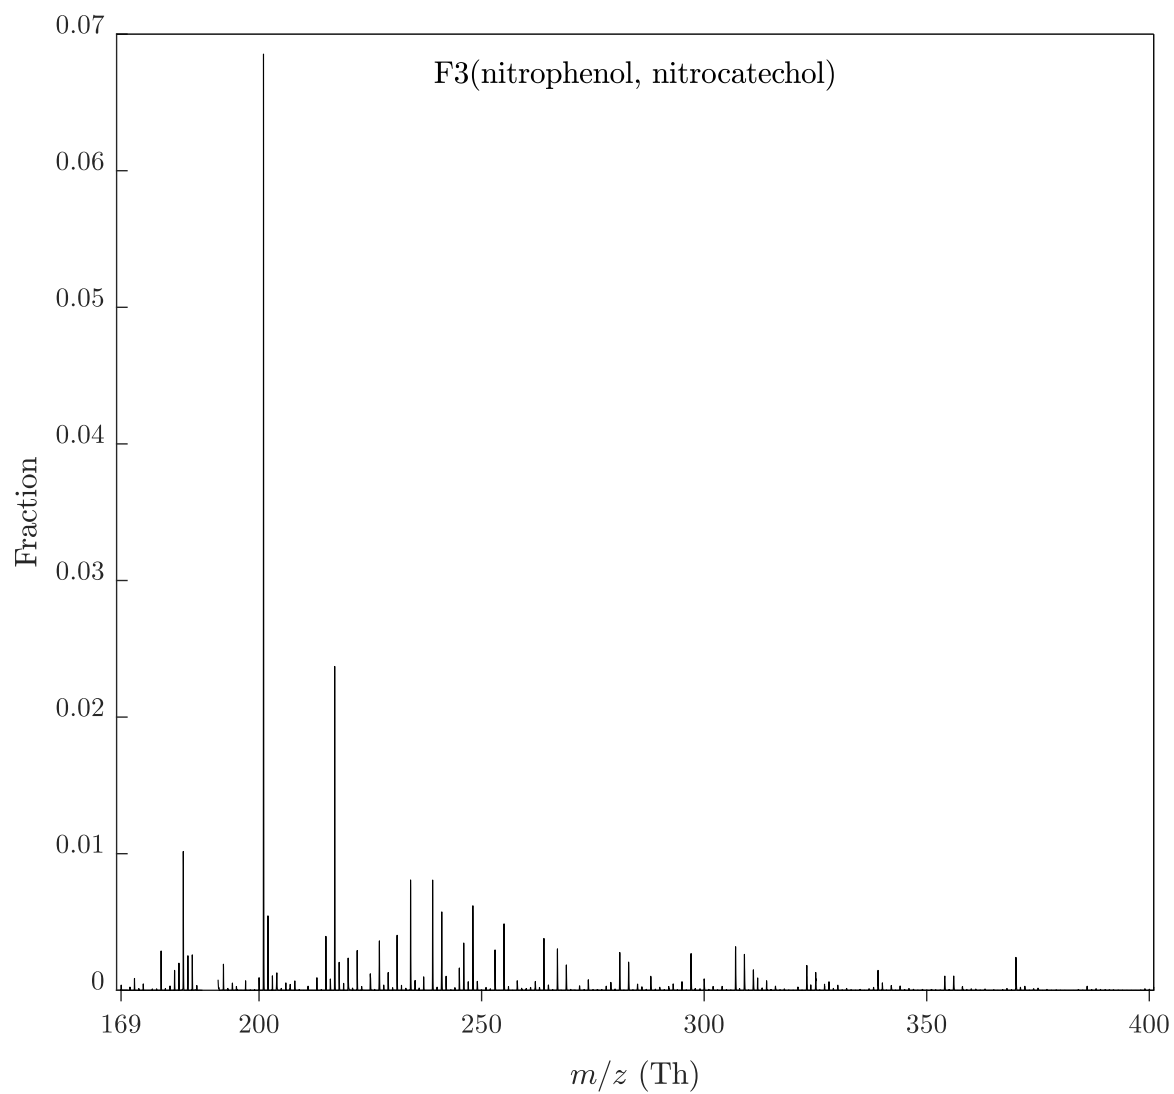

**Figure S4.** Normalized spectrum of the binPMF factor F3(nitrophenol, nitrocatechol) up to 400 Th.

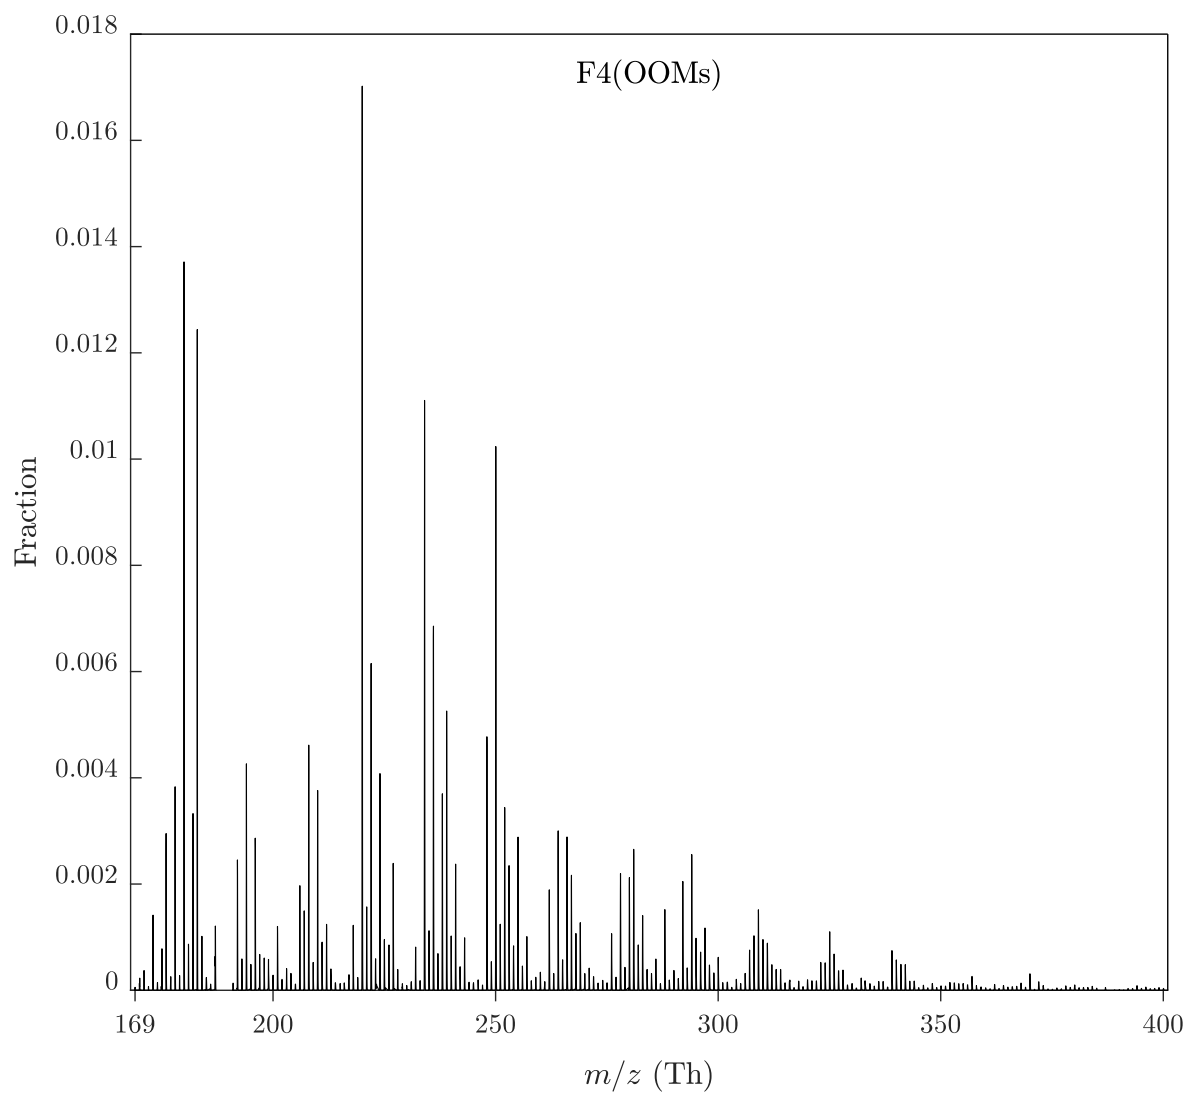

**Figure S5.** Normalized spectrum of the binPMF factor F4(OOMs) up to 400 Th.

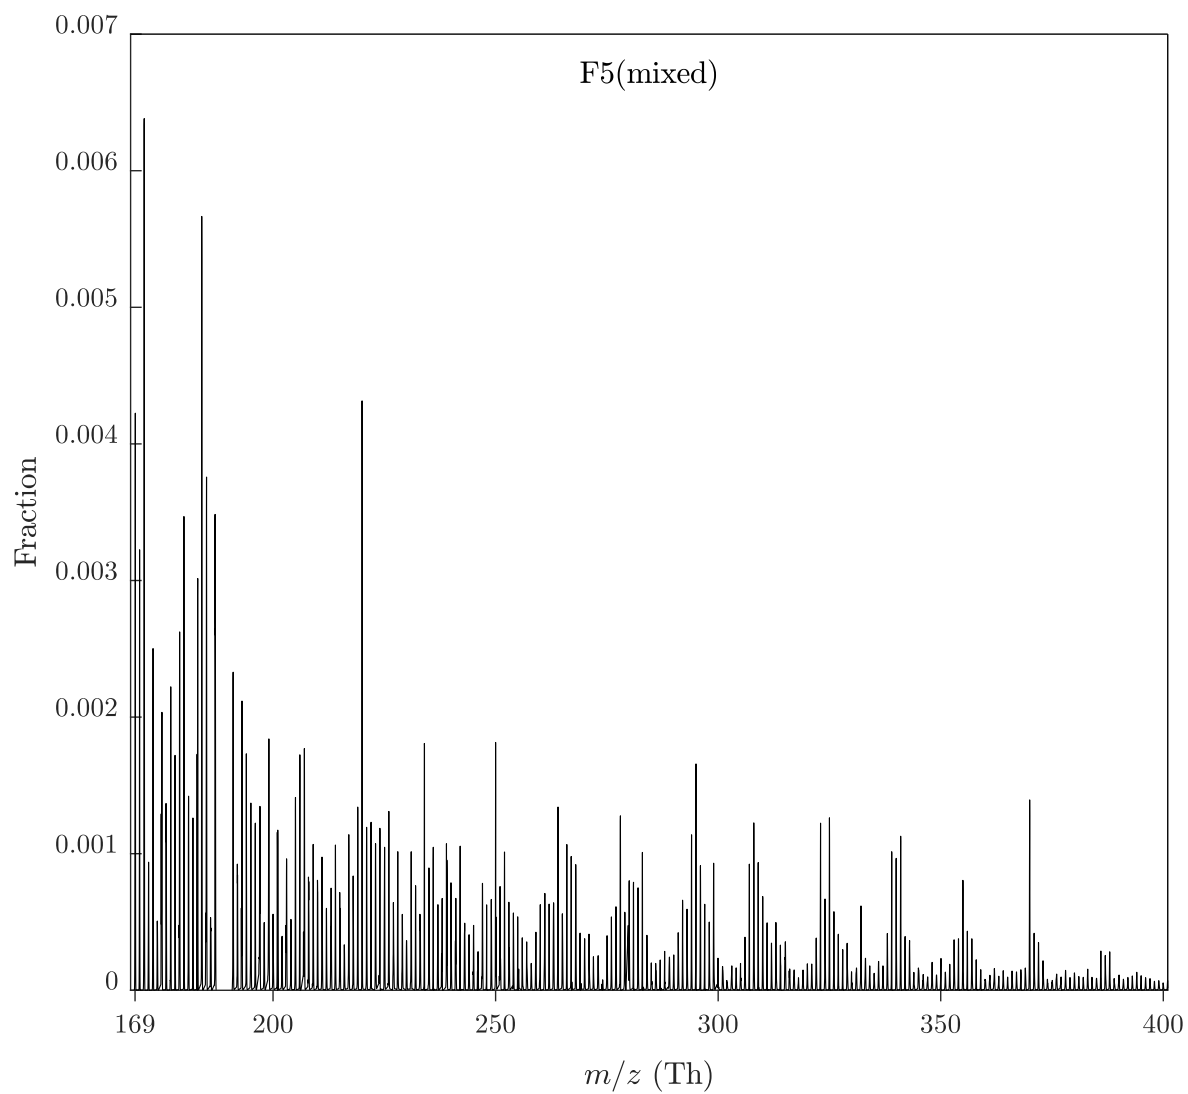

**Figure S6.** Normalized spectrum of the binPMF factor F5(mized) up to 400 Th.

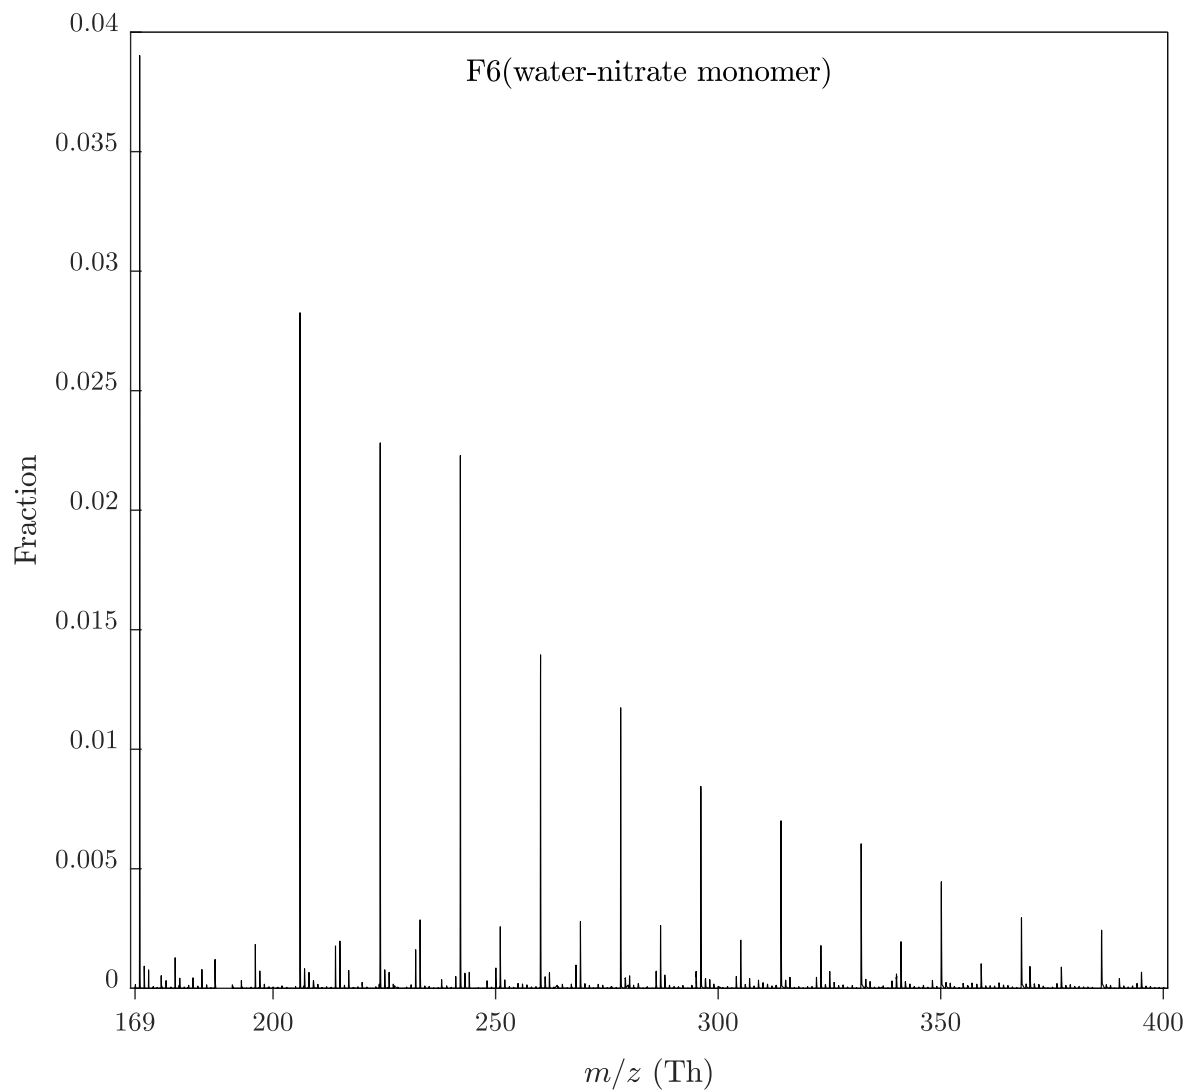

**Figure S7.** Normalized spectrum of the binPMF factor F6(water–nitrate monomer) up to 400 Th.



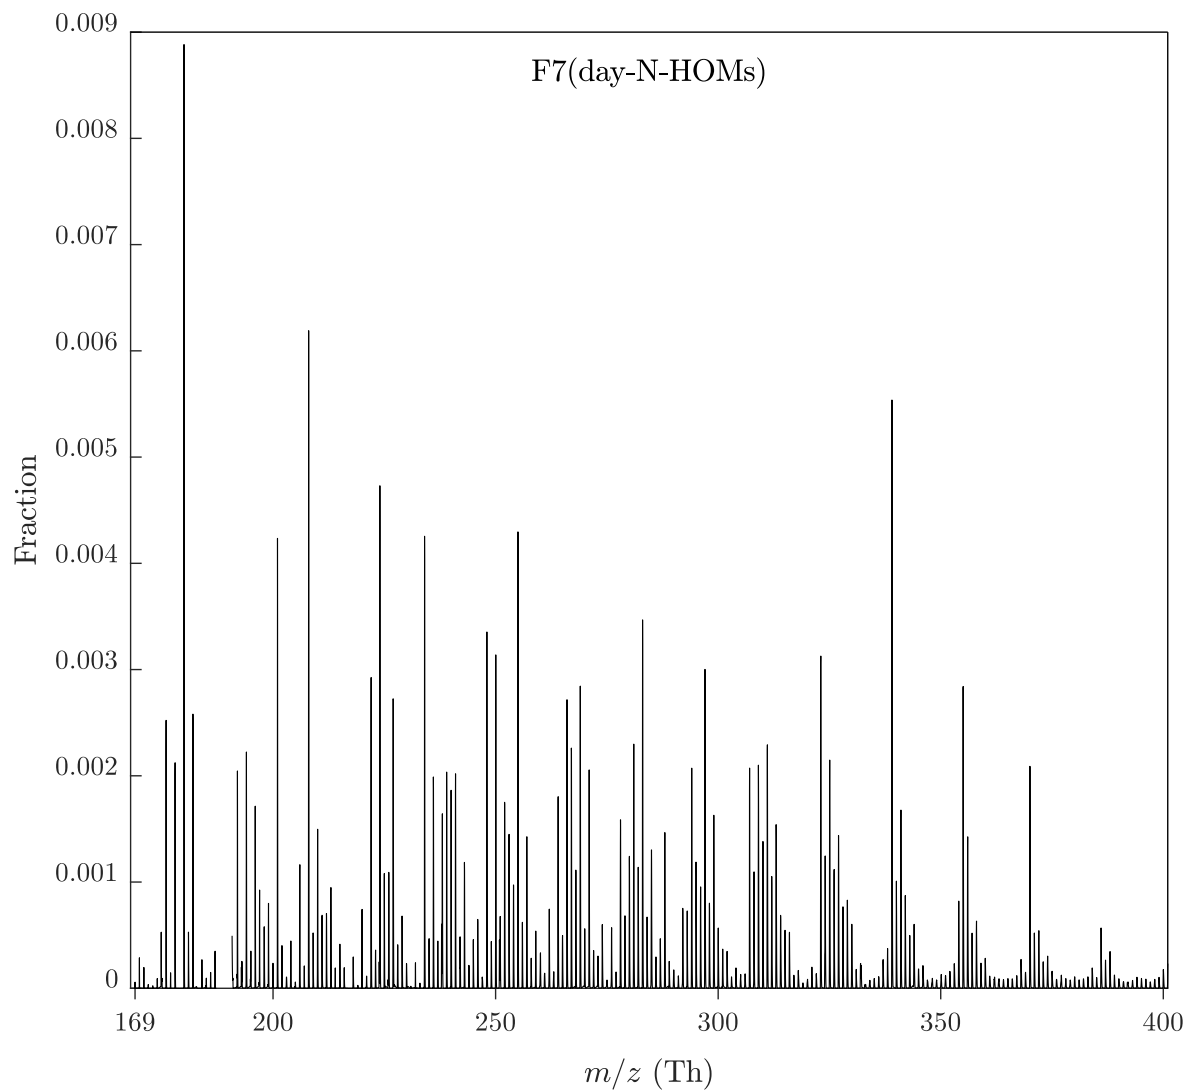

**Figure S8.** Normalized spectrum of the binPMF factor F7(day-N-HOMs) up to 400 Th.

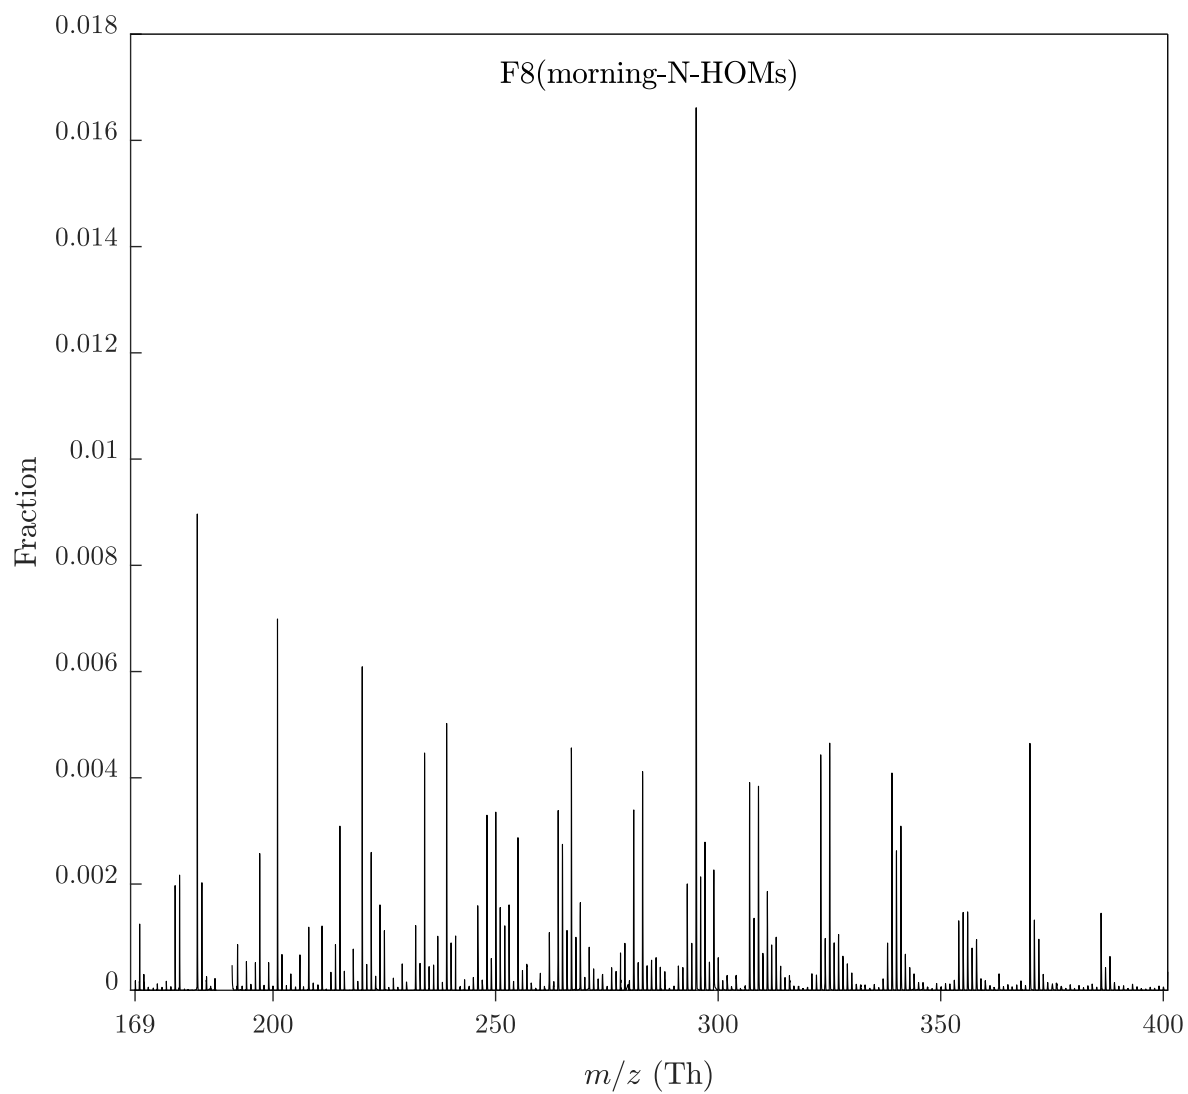

**Figure S9.** Normalized spectrum of the binPMF factor F8(morning-N-HOMs) up to 400 Th.

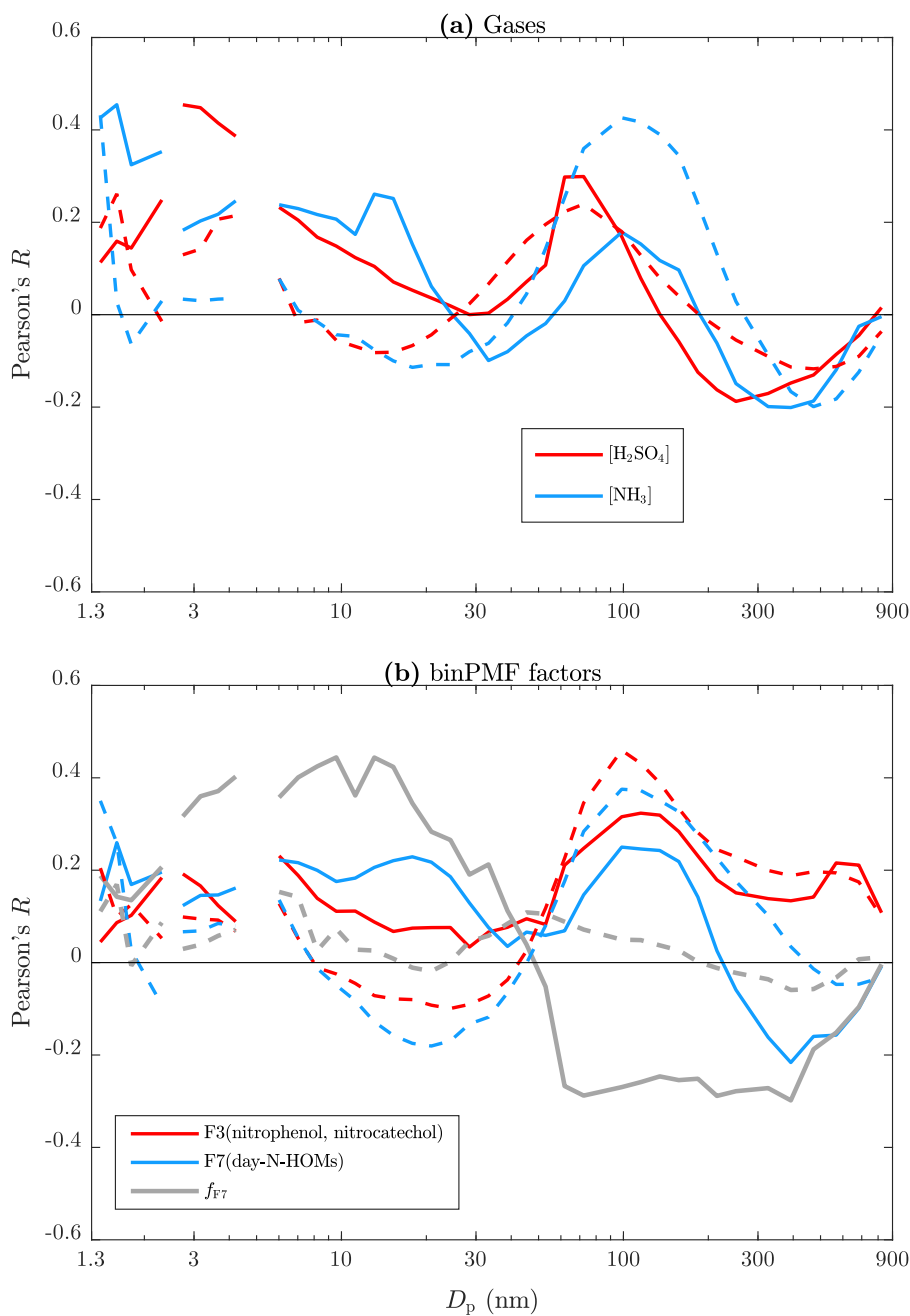

**Figure S10.** Pearson's correlation coefficient ( $R$ ) between all particle size bins and **(a)** the concentrations of sulfuric acid ( $[H_2SO_4]$ ) and ammonia ( $[NH_3]$ ) and **(b)** binPMF factors 3 and 7, together with the variable  $f_{F7}$ . Data below 3 nm are from a PSM, over 5 nm are from the DMPS, and the remaining part between them are from the NAIS. Solid lines denote data from the days with NPF events and dashed lines from the days with no NPF event. Due to a relative low amount of the data in these plots, the lines are shown regardless of their statistic significance.

**Table S1.** Classifications of the measurement days in terms of new particle formation events, according to the behavior of the measured particle size distributions.

| Day    | Classification | Day    | Classification | Day    | Classification |
|--------|----------------|--------|----------------|--------|----------------|
|        |                | May 1  | unclear        | Jun 1  | no event       |
|        |                | May 2  | no event       | Jun 2  | no event       |
| Apr 3  | no event       | May 3  | event          | Jun 3  | no event       |
| Apr 4  | no event       | May 4  | unclear        | Jun 4  | no event       |
| Apr 5  | no event       | May 5  | uncertain      | Jun 5  | no event       |
| Apr 6  | no event       | May 6  | no event       | Jun 6  | no event       |
| Apr 7  | no event       | May 7  | no event       | Jun 7  | no event       |
| Apr 8  | no event       | May 8  | event          | Jun 8  | no event       |
| Apr 9  | no event       | May 9  | event          | Jun 9  | unclear        |
| Apr 10 | no event       | May 10 | event          | Jun 10 | event          |
| Apr 11 | event          | May 11 | no event       | Jun 11 | event          |
| Apr 12 | event          | May 12 | no event       | Jun 12 | unclear        |
| Apr 13 | uncertain      | May 13 | event          | Jun 13 | unclear        |
| Apr 14 | uncertain      | May 14 | event          | Jun 14 | no event       |
| Apr 15 | event          | May 15 | event          | Jun 15 | no event       |
| Apr 16 | event          | May 16 | event          | Jun 16 | no event       |
| Apr 17 | event          | May 17 | event          | Jun 17 | unclear        |
| Apr 18 | event          | May 18 | event          | Jun 18 | unclear        |
| Apr 19 | unclear        | May 19 | no event       | Jun 19 | unclear        |
| Apr 20 | unclear        | May 20 | no event       | Jun 20 | unclear        |
| Apr 21 | no event       | May 21 | no event       | Jun 21 | unclear        |
| Apr 22 | no event       | May 22 | unclear        | Jun 22 | no event       |
| Apr 23 | no event       | May 23 | no event       | Jun 23 | unclear        |
| Apr 24 | no event       | May 24 | unclear        | Jun 24 | event          |
| Apr 25 | unclear        | May 25 | no event       | Jun 25 | event          |
| Apr 26 | no event       | May 26 | unclear        |        |                |
| Apr 27 | no event       | May 27 | event          |        |                |
| Apr 28 | event          | May 28 | no event       |        |                |
| Apr 29 | event          | May 29 | unclear        |        |                |
| Apr 30 | event          | May 30 | unclear        |        |                |
|        |                | May 31 | event          |        |                |

**Table S2.** List of the 10 tallest peaks in the binPMF factors. The values denote  $m/z$  (in Th) of the peaks in ascending order. The tallest peaks are marked in bold.

| F1<br>(low-mass) | F2<br>(water–nitrate<br>dimer) | F3<br>(nitrophenol,<br>nitrocatechol) | F4<br>(OOMs)    | F5<br>(mixed)   | F6<br>(water–nitrate<br>monomer) | F7<br>(day-N-HOMs) | F8<br>(morning-N-HOMs) |
|------------------|--------------------------------|---------------------------------------|-----------------|-----------------|----------------------------------|--------------------|------------------------|
| 178.0124         | 170.0531                       | 182.9971                              | 180.0173        | 169.0690        | <b>170.0531</b>                  | <b>180.0156</b>    | 182.9943               |
| 180.0171         | <b>179.0170</b>                | <b>201.0171</b>                       | 182.9899        | 170.0254        | 206.0747                         | 201.0157           | 201.0159               |
| <b>182.9960</b>  | 197.0278                       | 202.0200                              | 208.0300        | <b>171.0606</b> | 224.0849                         | 208.0159           | 220.0477               |
| 186.9861         | 206.0718                       | 217.0109                              | <b>220.0465</b> | 179.0216        | 242.0948                         | 224.0156           | 220.0477               |
| 192.0182         | 215.0387                       | 234.0615                              | 222.0456        | 179.9922        | 260.1054                         | 234.0614           | 239.0192               |
| 194.0262         | 224.0849                       | 239.0162                              | 234.0535        | 183.0787        | 278.1149                         | 248.0509           | 267.0465               |
| 201.0153         | 233.0494                       | 241.0585                              | 236.0449        | 183.9966        | 296.1236                         | 255.0276           | <b>295.0749</b>        |
| 220.0494         | 251.0581                       | 248.0504                              | 239.0190        | 185.0550        | 314.1326                         | 283.0417           | 323.0654               |
| 239.0191         | 269.0695                       | 255.0434                              | 248.0564        | 187.0077        | 332.1426                         | 323.0650           | 325.0703               |
| 246.0000         | 287.0777                       | 264.0093                              | 250.0571        | 220.0135        | 350.1475                         | 339.0585           | 370.0555               |

**Table S3.** Pearson’s correlation coefficients ( $R$ ) between the most important binPMF factors and UMR data. The bold values denote the most suitable UMR tracers for the binPMF factors. A perfectly selective UMR tracer for a factor would have  $R$  equal to the ones in footnotes (and  $R = 1$  between the factor and the tracer).  $R$  for the other factors not shown here for these selected UMR tracers are less than 0.40.

| UMR                | 220               | 236               | 285               | 271               | 339               | 295               | 265               |
|--------------------|-------------------|-------------------|-------------------|-------------------|-------------------|-------------------|-------------------|
| F4(OOMs)           | <b>0.98</b>       | <b>0.97</b>       | 0.65 <sup>a</sup> | 0.64 <sup>a</sup> | 0.59 <sup>a</sup> | 0.43 <sup>b</sup> | 0.62 <sup>b</sup> |
| F7(day-N-HOMs)     | 0.54 <sup>a</sup> | 0.63 <sup>a</sup> | <b>0.91</b>       | <b>0.89</b>       | <b>0.87</b>       | 0.37 <sup>c</sup> | 0.54 <sup>c</sup> |
| F8(morning-N-HOMs) | 0.47 <sup>b</sup> | 0.36 <sup>b</sup> | 0.36 <sup>c</sup> | 0.42 <sup>c</sup> | 0.52 <sup>c</sup> | <b>0.95</b>       | <b>0.82</b>       |

<sup>a</sup>  $R = 0.47$  between F4(OOMs) and F7(day-N-HOMs)

<sup>b</sup>  $R = 0.30$  between F4(OOMs) and F8(morning-N-HOMs)

<sup>c</sup>  $R = 0.25$  between F7(day-N-HOMs) and F8(morning-N-HOMs)
